# Supplementary material for: Immune and pathophysiologic profiling of antenatal coronavirus disease 2019 in the GIFT cohort: A Singaporean case-control study
Source: PubMed Central journal article supplement (PMC9521552; doi:10.3389/fped.2022.949756), 2022-09-15
Supplement: Data_Sheet_1.pdf [file Data_Sheet_1.pdf]

## Supplementary Material

### 1 Supplementary Data

#### Supplementary Data 1. Protein BLAST result between S21P2 peptide and HCV proteins.

### 2 Supplementary Figures and Tables

#### 2.1 Supplementary Figures

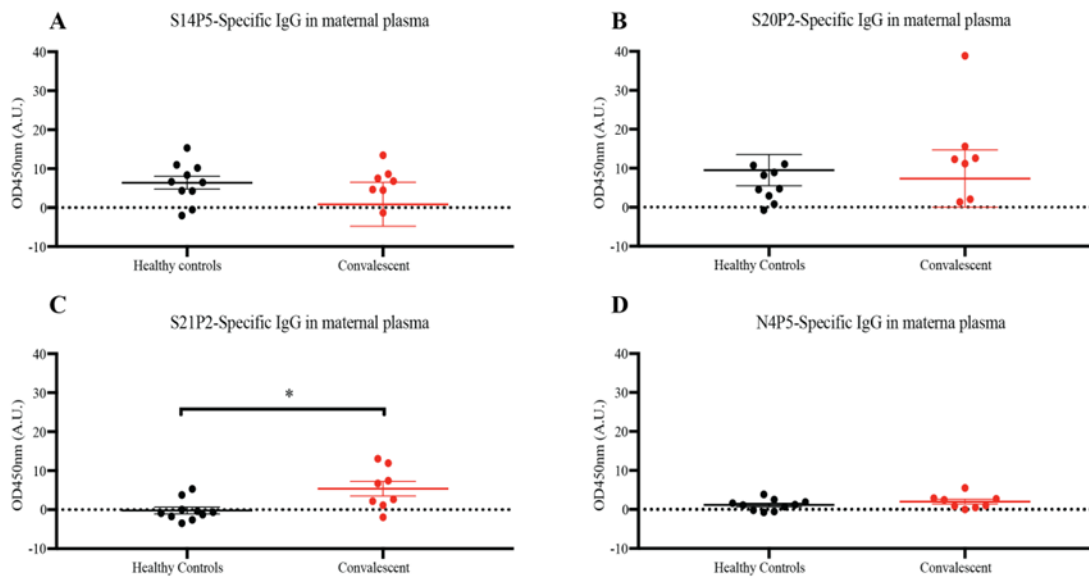

**Supplementary Figure 1. Screening IgG antibodies against four immunodominant epitopes in maternal plasma.** Using 1-month post-partum maternal plasma from control (CT01-CT10) and convalescent (CS01-CS08) mothers. An evaluation of IgG levels against (A) S14P5, (B) S20P2, (C) S21P2, and (D) N4P5 peptides. Bar graphs represent the normalized average signals, and the dotted line is the averaged signals from the controls.

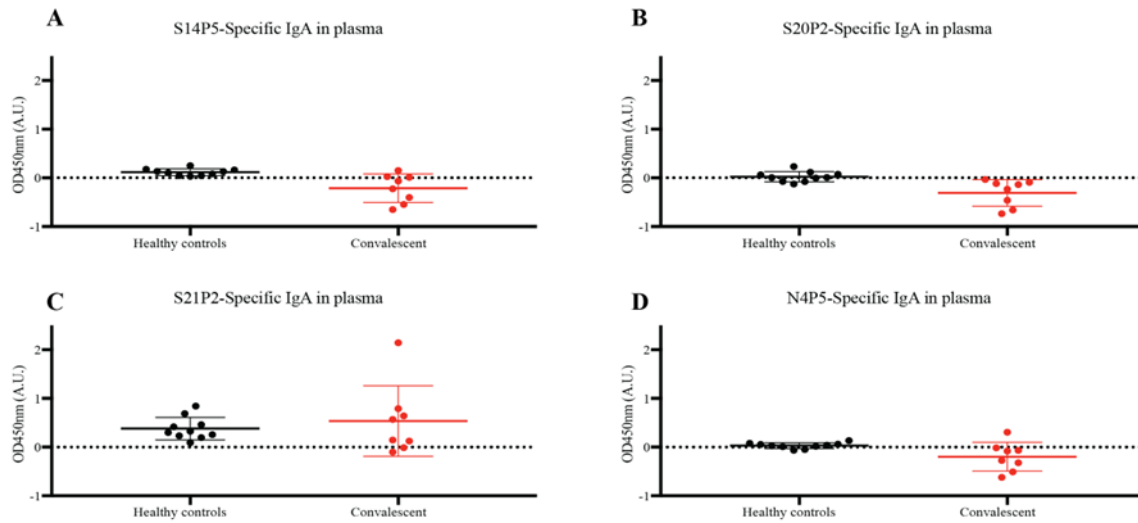

**Supplementary Figure 2. Screening IgA antibodies against four immunodominant epitopes in maternal plasma.** Using 1-month post-partum maternal plasma from control (CT01-CT10) and convalescent (CS01-CS08) mothers. An evaluation of IgA levels against (A) S14P5, (B) S20P2, (C) S21P2, and (D) N4P5 peptides. Bar graphs represent the averaged normalized signals, and the dotted line is the averaged signals from the controls. The sample with the highest signal in (C) under convalescent mothers represents CS04.

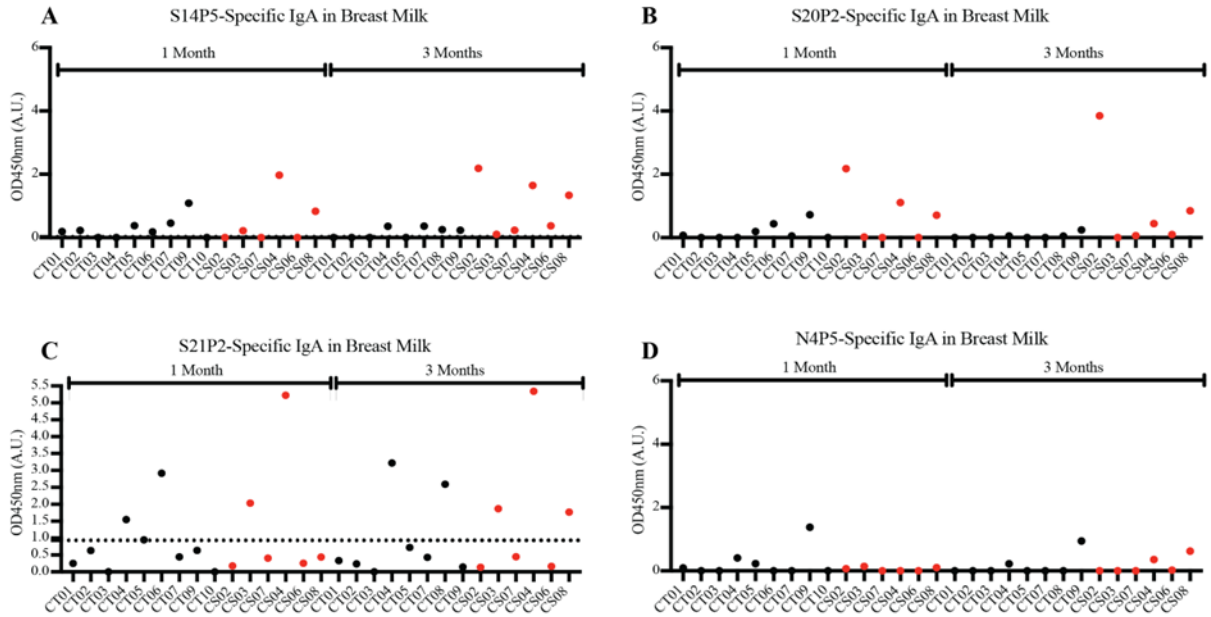

**Supplementary Figure 3. Screening IgA antibodies against four immunodominant epitopes in maternal breast milk at 1 and 3 months post-partum.** Using 1 and 3-month post-partum maternal breast milk from control (CT01-CT10) and convalescent (CS01-CS08) mothers. An evaluation of IgA levels against (A) S14P5, (B) S20P2, (C) S21P2, and (D) N4P5 peptides. Bar graphs represent the averaged normalized signals, and the dotted line is the averaged signals from the controls. Convalescent mothers (CS samples) are arranged in ascending order according to their time from COVID diagnosis to delivery.

**Supplementary Table 1. Information on the time from diagnosis to delivery for the convalescent participants.**

| Sample | Interval from COVID diagnosis to delivery (Days) |
|--------|--------------------------------------------------|
| CS01   | 37                                               |
| CS02   | 69                                               |
| CS03   | 76                                               |
| CS04   | 105                                              |
| CS05   | 111                                              |
| CS06   | 226                                              |
| CS07   | 92                                               |
| CS08   | 250                                              |

**Supplementary Table 2. Individual characteristics of convalescent women.**

|                                          | CS01    | CS02      | CS03      | CS04    | CS05    | CS06     | CS07         | CS08    |
|------------------------------------------|---------|-----------|-----------|---------|---------|----------|--------------|---------|
| Maternal Age (Years)                     | 30      | 26        | 36        | 35      | 27      | 31       | 27           | 30      |
| Maternal Ethnicity                       | Indian  | Caucasian | Caucasian | Malay   | Malay   | Chinese  | Indian       | Malay   |
| Diagnosis of COVID-19 (Gestation, weeks) | 36      | 32        | 29        | 24      | 22      | 10       | 28           | 4       |
| COVID severity (WHO classification)      | Mild    | Mild      | Mild      | Mild    | Mild    | Moderate | Asymptomatic | Mild    |
| Mode of delivery                         | Vaginal | Vaginal   | Vaginal   | Vaginal | Vaginal | Vaginal  | Vaginal      | Vaginal |

**Supplementary Table 3. Individual laboratory results of convalescent women peri-delivery.**

|                                                                    | CS01     | CS02     | CS03     | CS04     | CS05     | CS06     | CS07         | CS08     |
|--------------------------------------------------------------------|----------|----------|----------|----------|----------|----------|--------------|----------|
| COVID-19 nasopharyngeal swab (closest swab done prior to delivery) | Negative | Negative | Negative | Negative | Negative | Not done | Not done     | Not done |
| COVID-19 in serum                                                  | Negative | Negative | Negative | Negative | Negative | Negative | Negative     | Negative |
| COVID-19 in vaginal swab                                           | Negative | Negative | Not done | Negative | Not done | Negative | Negative     | Negative |
| COVID-19 swab of umbilical cord                                    | Negative | Negative | Negative | Negative | Negative | Negative | Negative     | Negative |
| COVID-19 swab of placenta                                          | Negative | Negative | Negative | Negative | Negative | Negative | Negative     | Negative |
| COVID-19 swab of amniotic fluid                                    | Not done | Negative | Not done | Negative | Negative | Negative | Negative     | Not done |
| COVID-19 swab of breast milk                                       | Not done | Negative | Negative | Negative | Not done | Negative | Inconclusive | Not done |

**Supplementary Table 4. Individual characteristics of neonates born to convalescent women.**

|                                                  | CS01    | CS02    | CS03    | CS04    | CS05    | CS06    | CS07    | CS08    |
|--------------------------------------------------|---------|---------|---------|---------|---------|---------|---------|---------|
| Mode of delivery                                 | Vaginal | Vaginal | Vaginal | Vaginal | Vaginal | Vaginal | Vaginal | Vaginal |
| Gestational Age (weeks + days)                   | 41+2    | 39+6    | 39+4    | 39+5    | 38+0    | 41+3    | 39+0    | 40+1    |
| Gender                                           | Male    | Female  | Female  | Female  | Female  | Male    | Female  | Female  |
| Birth weight (g)                                 | 3915    | 3210    | 3895    | 3505    | 2695    | 3525    | 3645    | 3750    |
| OFC (cm)                                         | 35.5    | 34      | 36      | 33.5    | 33      | 35      | 34      | 35      |
| Length (cm)                                      | 52      | 48      | 52      | 52      | 47      | 52      | 50      | 51      |
| APGAR score at 1, 5 minutes of life respectively | 9,9     | 9,9     | 9,9     | 9,9     | 9,9     | 9,9     | 9,9     | 9,9     |
